# Supplementary material for: The Impact of eHealth Interventions on the Improvement of Self-Care in Chronic Patients: An Overview of Systematic Reviews
Source: MDPI journal article supplement (doi:10.3390/life12081253), 2022-08-17
Supplement: s1 [file s1]

# Supplementary File S1 – search strategy

## Pubmed

((((((((((((((((((("Chronic Disease"[Title/Abstract] OR "chronic disease\*"[Title/Abstract]) OR "Diabetes mellitus type 2"[Title/Abstract]) OR "Diabetes mellitus type II"[Title/Abstract]) OR "Diabetes mellitus type two"[Title/Abstract]) OR "type II Diabetes"[Title/Abstract]) OR "type two Diabetes"[Title/Abstract]) OR "Type 2 Diabetes"[Title/Abstract]) OR "Diabetes type 2"[Title/Abstract]) OR "Diabetes type II"[Title/Abstract]) OR "Diabetes type two"[Title/Abstract]) OR "T2D"[Title/Abstract]) OR "T2DM"[Title/Abstract]) OR "COPD"[Title/Abstract]) OR "Chronic obstructive pulmonary disease"[Title/Abstract]) OR "Cardiovascular disease"[Title/Abstract]) OR "cardiovascular disease\*"[Title/Abstract]) OR "CVD"[Title/Abstract]) OR "CVD"[Title/Abstract]) OR "Cardiovascular Diseases"[MeSH Terms]) OR "Chronic Disease"[MeSH Terms]) OR "diabetes mellitus, type 2"[MeSH Terms]) AND (((((((((((((((((((("ehealth"[Title/Abstract] OR "e-health"[Title/Abstract]) OR "Telemedicine"[Title/Abstract]) OR "telemed\*"[Title/Abstract]) OR "Telemedicine"[MeSH Terms]) OR "telehealth"[Title/Abstract]) OR "mhealth"[Title/Abstract]) OR "m-health"[Title/Abstract]) OR "mobile health"[Title/Abstract]) OR "digital health"[Title/Abstract]) OR "videoconferenc\*"[Title/Abstract]) OR "video conferenc\*"[Title/Abstract]) OR "telemonitor\*"[Title/Abstract]) OR "tele monitor\*"[Title/Abstract]) OR "e-mail"[Title/Abstract]) OR "electronic mail"[Title/Abstract]) OR "short message"[Title/Abstract]) OR "short messaging"[Title/Abstract]) OR "electronic messaging"[Title/Abstract]) OR "SMS"[Title/Abstract]) OR "app"[Title/Abstract]) OR "mobile application"[Title/Abstract]) OR "mobile applications"[Title/Abstract]) OR "phone"[Title/Abstract]) OR "social network"[Title/Abstract]) OR "e-learning"[Title/Abstract]) OR "web-based"[Title/Abstract]) OR "web-based"[Title/Abstract])) AND (("systematic review"[Title/Abstract] OR "systematic review\*"[Title/Abstract]) OR "meta analys\*"[Title/Abstract])) AND (((("self care"[Title/Abstract] OR "self-monitoring"[Title/Abstract]) OR "self-management"[Title/Abstract]) OR "self-maintenance"[Title/Abstract]) OR "self care"[MeSH Terms])

## CINAHL - Cumulative Index to Nursing and Allied Health Literature.

AB "Chronic Disease" OR "chronic disease\*" OR "Diabetes mellitus type 2" OR "Diabetes mellitus type II" OR "Diabetes mellitus type two" OR "type II Diabetes" OR "type two Diabetes" OR Type 2 Diabetes" OR "Diabetes type 2" OR "Diabetes type II" OR "Diabetes type two" OR "T2D" OR "T2DM" OR "COPD" OR "Chronic obstructive pulmonary disease" OR "Cardiovascular disease" OR "cardiovascular disease\*" OR CVD AND AB "ehealth" OR "e-health" OR "Telemedicine" OR "telemed\*" OR "Telemedicine" OR "telehealth"[Title/Abstract]) OR "mhealth" OR "m-health" OR "mobile health" OR "digital health" OR "videoconferenc\*" OR "video conferenc\*" OR "telemonitor\*" OR "tele monitor\*" OR "e-mail" OR "electronic mail" OR "short message" OR "short messaging" OR "electronic messaging" OR "SMS" OR "app" OR "mobile application" OR "mobile applications" OR "phone" OR "social network" OR "e-learning" OR "web-based" OR "web-based" AND AB "self care" OR "self-monitoring" OR "self-management" OR "self-maintenance" AND AB "systematic review" OR "systematic review\*" OR "meta analys\*"

## APA PsycInfo

AB "Chronic Disease" OR "chronic disease\*" OR "Diabetes mellitus type 2" OR "Diabetes mellitus type II" OR "Diabetes mellitus type two" OR "type II Diabetes" OR "type two Diabetes" OR Type 2 Diabetes" OR "Diabetes type 2" OR "Diabetes type II" OR "Diabetes type two" OR "T2D" OR "T2DM" OR "COPD" OR "Chronic obstructive pulmonary disease" OR "Cardiovascular disease" OR "cardiovascular disease\*" OR CVD AND AB "ehealth" OR "e-health" OR "Telemedicine" OR "telemed\*" OR "Telemedicine" OR "telehealth"[Title/Abstract]) OR "mhealth" OR "m-health" OR "mobile health" OR "digital health" OR "videoconferenc\*" OR "video conferenc\*" OR "telemonitor\*" OR "tele monitor\*" OR "e-mail" OR "electronic mail" OR "short message" OR "short messaging" OR "electronic messaging" OR "SMS" OR "app" OR "mobile application" OR "mobile applications" OR "phone" OR "social network" OR "e-learning" OR "web-based" OR "web-based" AND AB "self care" OR "self-monitoring" OR "self-management" OR "self-maintenance" AND AB "systematic review" OR "systematic review\*" OR "meta analys\*"

## Scopus

(( ( TITLE-ABS-KEY ( "chronic disease" OR "Diabetes mellitus type 2" OR "Diabetes mellitus type II" ) OR "Diabetes mellitus type two" OR "type II Diabetes" OR "type two Diabetes" OR "Type 2 Diabetes" OR "Diabetes type 2" OR "Diabetes type II" OR "Diabetes type two" OR "T2D" OR "T2DM" OR "COPD" OR "Chronic obstructive pulmonary disease" OR "Cardiovascular disease" OR "cardiovascular disease\*" OR "CVD" ) AND ( TITLE-ABS-KEY ( "ehealth" OR "e-health" OR "Telemedicine" OR "telemed\*" OR "Telemedicine" OR "telehealth" OR "mhealth" OR "m-health" OR "mobile health" OR "digital health" OR "videoconferenc\*" OR "video conferenc\*" OR "telemonitor\*" OR "tele monitor\*" OR "e-mail" OR "electronic mail" OR "short message" OR "short messaging" OR "electronic messaging" OR "SMS" OR "app" OR "mobile application" OR "mobile applications" OR "phone" OR "social network" OR "e-learning" OR "web-based" OR "web-based" ) ) ) AND ( TITLE-ABS-KEY ( "self care" OR "self-monitoring" OR "self-management" OR "self-maintenance" ) ) ) AND ( TITLE-ABS-KEY ( "systematic review" OR "systematic review\*" OR "meta analys\*" ) ) )

## COCHRANE LIBRARY

AB "Chronic Disease" OR "chronic disease\*" OR "Diabetes mellitus type 2" OR "Diabetes mellitus type II" OR "Diabetes mellitus type two" OR "type II Diabetes" OR "type two Diabetes" OR "Type 2 Diabetes" OR "Diabetes type 2" OR "Diabetes type II" OR "Diabetes type two" OR "T2D" OR "T2DM" OR "COPD" OR "Chronic obstructive pulmonary disease" OR "Cardiovascular disease" OR "cardiovascular disease\*" OR "CVD" AND AB "ehealth" OR "e-health" OR "Telemedicine" OR "telemed\*" OR "Telemedicine" OR "telehealth"[Title/Abstract] OR "mhealth" OR "m-health" OR "mobile health" OR "digital health" OR "videoconferenc\*" OR "video conferenc\*" OR "telemonitor\*" OR "tele monitor\*" OR "e-mail" OR "electronic mail" OR "short message" OR "short messaging" OR "electronic messaging" OR "SMS" OR "app" OR "mobile application" OR "mobile applications" OR "phone" OR "social network" OR "e-learning" OR "web-based" OR "web-based" AND AB "self care" OR "self-monitoring" OR "self-management" OR "self-maintenance" AND AB "systematic review" OR "systematic review\*" OR "meta analys\*"
